# Supplementary material for: A Learning Theory for Reward-Modulated Spike-Timing-Dependent Plasticity with Application to Biofeedback
Source: PLOS journal article supplement (doi:10.1371/journal.pcbi.1000180), 2008-10-09
Supplement: S3 (10.1371/journal.pcbi.1000180.s003) [file journal.pcbi.1000180.s003]

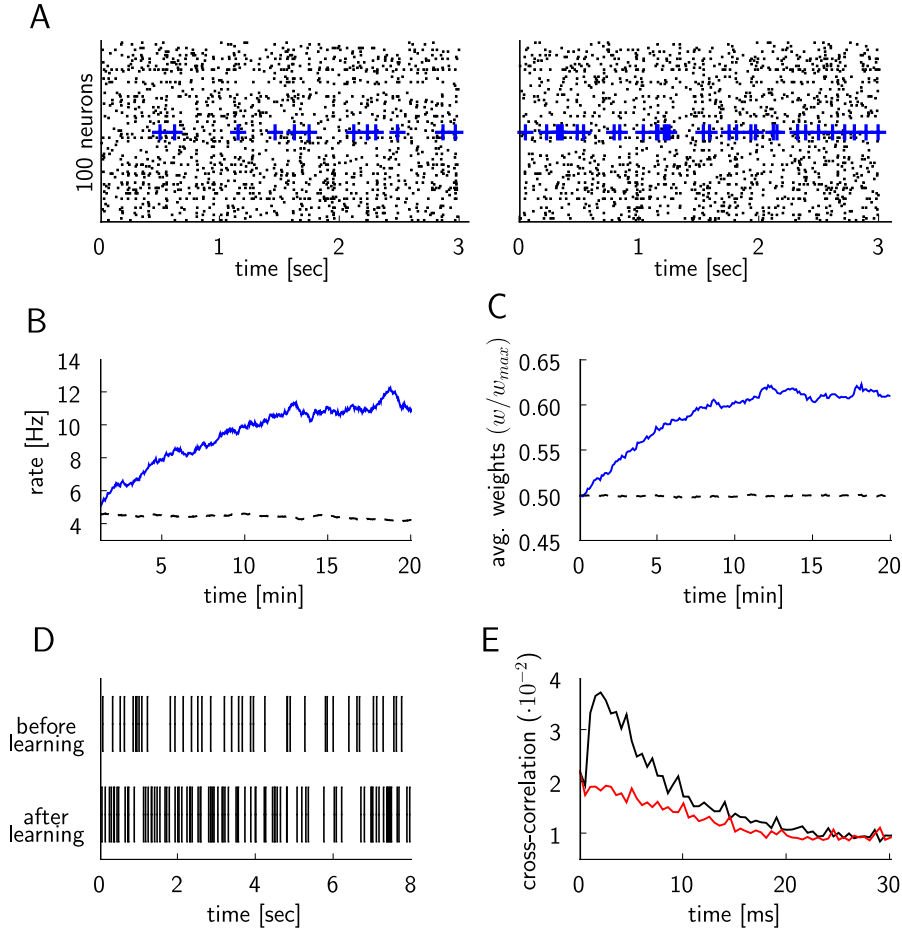

Figure S3: Variation of Fig. 3 from computer simulation 1 with results from a simulation where the weight-dependent version of STDP proposed in [23] was used. This STDP rule is defined by the following equations:  $\Delta w_+ = \lambda w_0^{1-\mu} w^\mu e^{-|\Delta t|/\tau_+}$  and  $\Delta w_- = \lambda \alpha w e^{-|\Delta t|/\tau_-}$ . We used the parameters proposed in [23], i.e.  $\mu = 0.4$ ,  $\alpha = 0.11$ ,  $\tau_+ = \tau_- = 20\text{ms}$ ,  $\lambda = 0.1$  and  $w_0 = 272.6\text{ pS}$ . The  $w_0$  parameter was calculated according to the formula:  $w_0 = \frac{1}{2} w_{max} \alpha^{\frac{1}{1-\mu}}$  where  $w_{max}$  is the maximum synaptic weight of the synapse. The amplitude parameters  $A_r^+$ ,  $A_r^-$  for the reward kernel were set to  $A_r^+ = 1.104$  and  $A_r^- = 0.221$ . All other parameter values were the same as in computer simulation 1.
