# Supplementary material for: A Learning Theory for Reward-Modulated Spike-Timing-Dependent Plasticity with Application to Biofeedback
Source: PLOS journal article supplement (doi:10.1371/journal.pcbi.1000180), 2008-10-09
Supplement: S4 (10.1371/journal.pcbi.1000180.s004) [file journal.pcbi.1000180.s004]

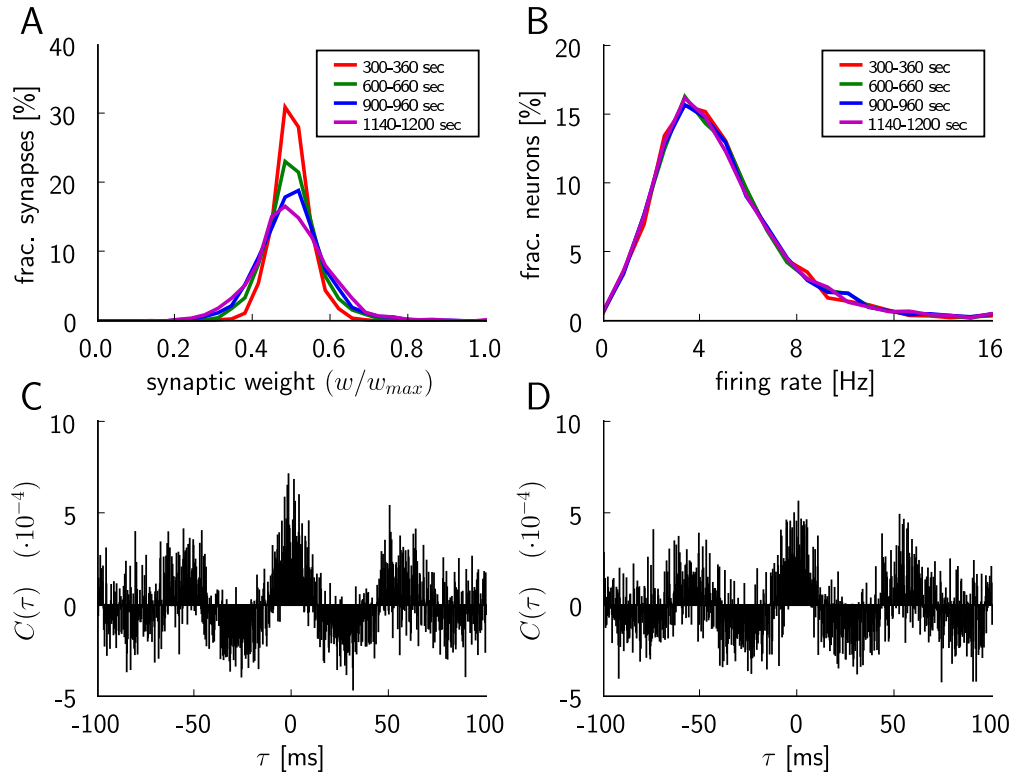

Figure S4: Variation of Fig. 5 for the weight-dependent STDP rule from [23] (as in Fig. S3).
