# Supplementary material for: A Learning Theory for Reward-Modulated Spike-Timing-Dependent Plasticity with Application to Biofeedback
Source: PLOS journal article supplement (doi:10.1371/journal.pcbi.1000180), 2008-10-09
Supplement: S5 (10.1371/journal.pcbi.1000180.s005) [file journal.pcbi.1000180.s005]

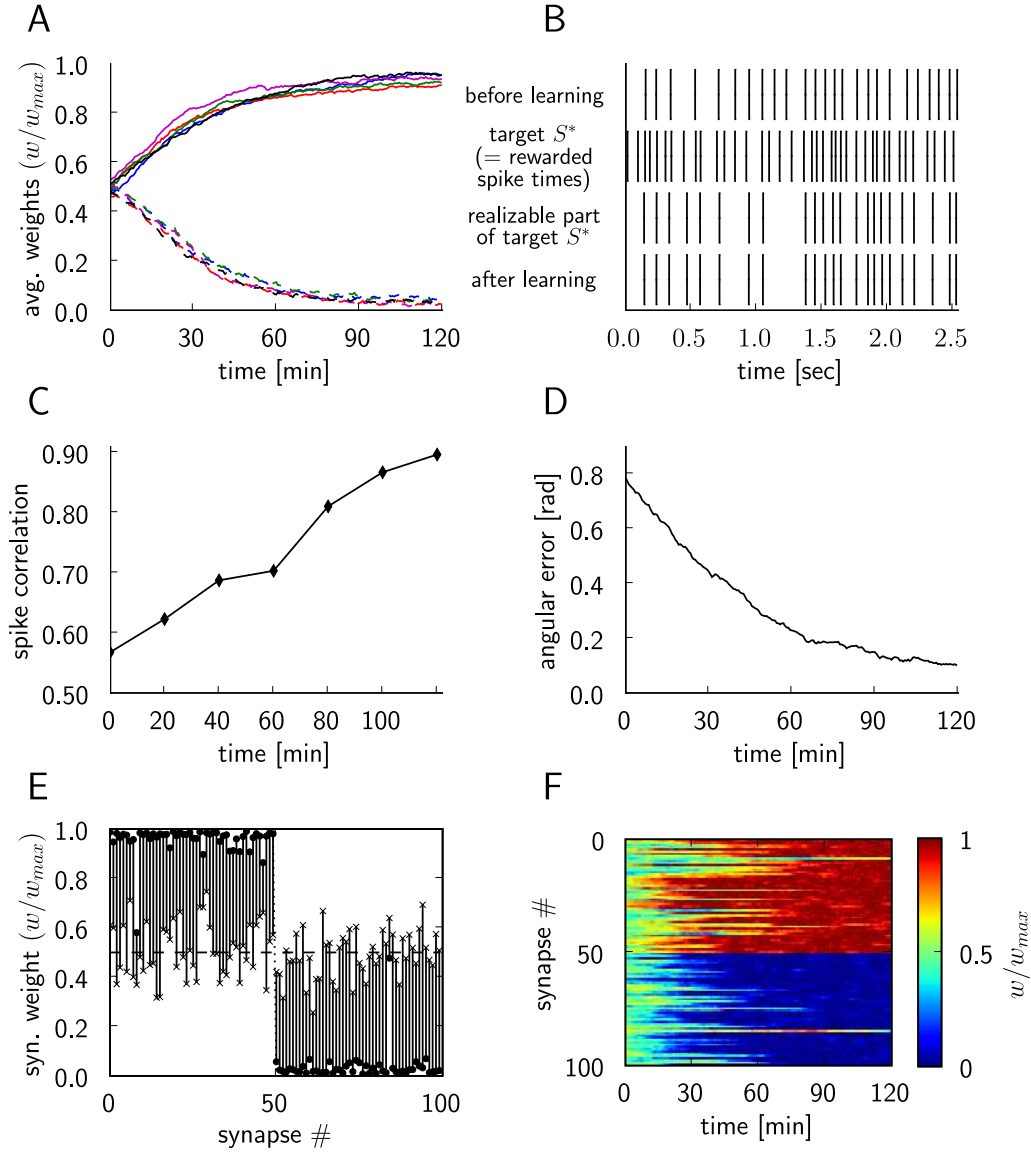

Figure S5: Variation of Fig. 7 (i.e., of computer simulation 2) for a simulation where we used current-based synapses without short-term plasticity. The post-synaptic response had an exponentially decaying form  $\epsilon(s) = e^{-s/\tau_\epsilon}/\tau_\epsilon$ , with  $\tau_\epsilon = 5ms$ . The value of the maximum synaptic weight was  $w_{max} = 32.9$  pA. All other parameter values were the same as in computer simulation 2.
