# Supplementary material for: A Learning Theory for Reward-Modulated Spike-Timing-Dependent Plasticity with Application to Biofeedback
Source: PLOS journal article supplement (doi:10.1371/journal.pcbi.1000180), 2008-10-09
Supplement: S8 (10.1371/journal.pcbi.1000180.s008) [file journal.pcbi.1000180.s008]

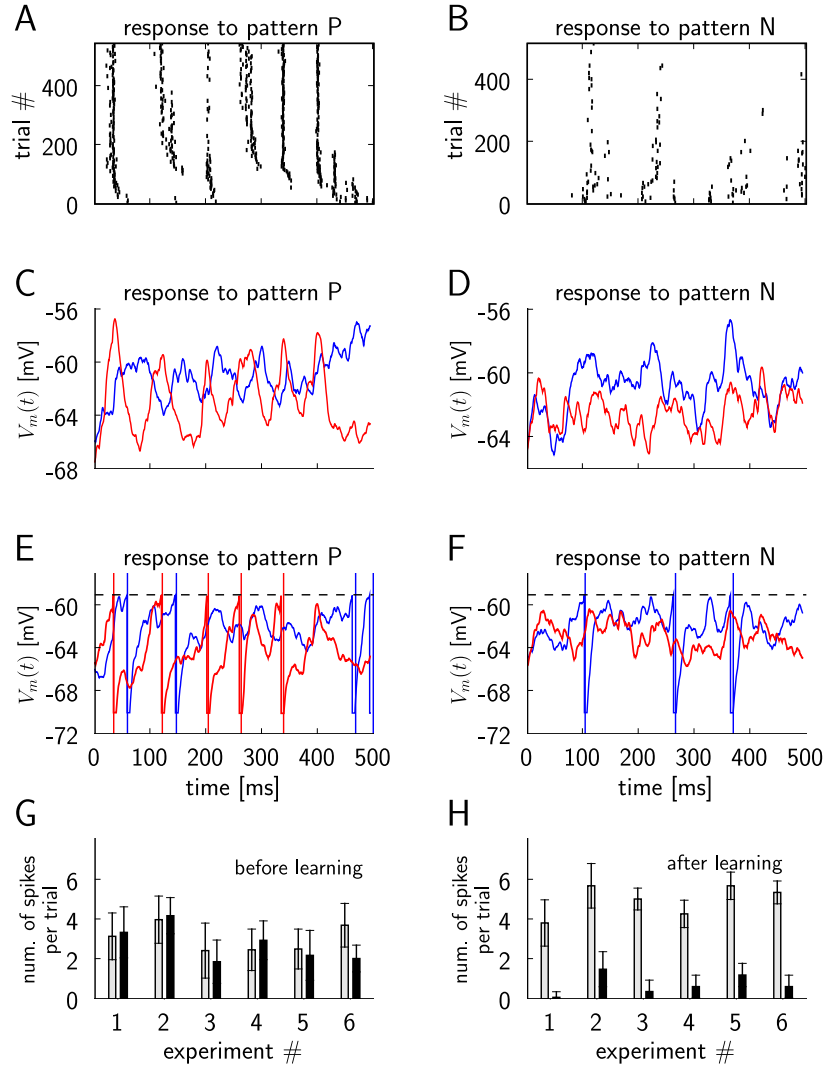

Figure S8: Variation of Fig. 9 for a simulation where we used current-based synapses without short-term plasticity. The post-synaptic response had an exponentially decaying form  $\epsilon(s) = e^{-s/\tau_\epsilon}/\tau_\epsilon$ , with  $\tau_\epsilon = 5ms$ . The value of the maximum synaptic weight was  $w_{max} = 106.2$  pA. All other parameter values were the same as in computer simulation 4. The variance of the membrane potential increased for pattern  $P$  from  $2.84(mV)^2$  to  $5.89(mV)^2$  (panel C), and decreased for pattern  $N$  (panel D), from  $2.57(mV)^2$  to  $1.22(mV)^2$ .
