# Supplementary material for: A Learning Theory for Reward-Modulated Spike-Timing-Dependent Plasticity with Application to Biofeedback
Source: PLOS journal article supplement (doi:10.1371/journal.pcbi.1000180), 2008-10-09
Supplement: S9 (10.1371/journal.pcbi.1000180.s009) [file journal.pcbi.1000180.s009]

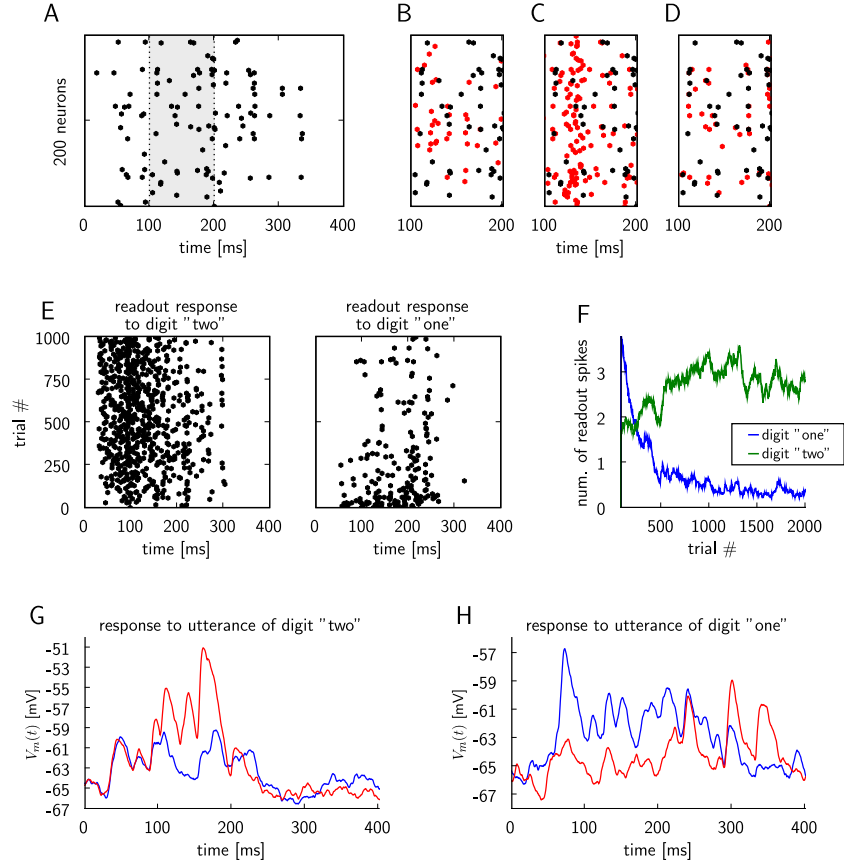

Figure S9: Variation of Fig. 10 (i.e., of computer simulation 5) for a simulation where we used current-based synapses without short-term plasticity. The post-synaptic response had an exponentially decaying form  $\epsilon(s) = e^{-s/\tau_\epsilon}/\tau_\epsilon$ , with  $\tau_\epsilon = 5ms$ . The synaptic weights of the excitatory and inhibitory synapses in the cortical microcircuit were set to  $w_{exc} = 65.4$  pA and  $w_{inh} = 238$  pA respectively. The maximum synaptic weight of the synapses to the readout neuron was  $w_{max} = 54.3$  pA. All other parameter values were the same as in computer simulation 5.
