# Supplementary material for: A Learning Theory for Reward-Modulated Spike-Timing-Dependent Plasticity with Application to Biofeedback
Source: PLOS journal article supplement (doi:10.1371/journal.pcbi.1000180), 2008-10-09
Supplement: S10 (10.1371/journal.pcbi.1000180.s010) [file journal.pcbi.1000180.s010]

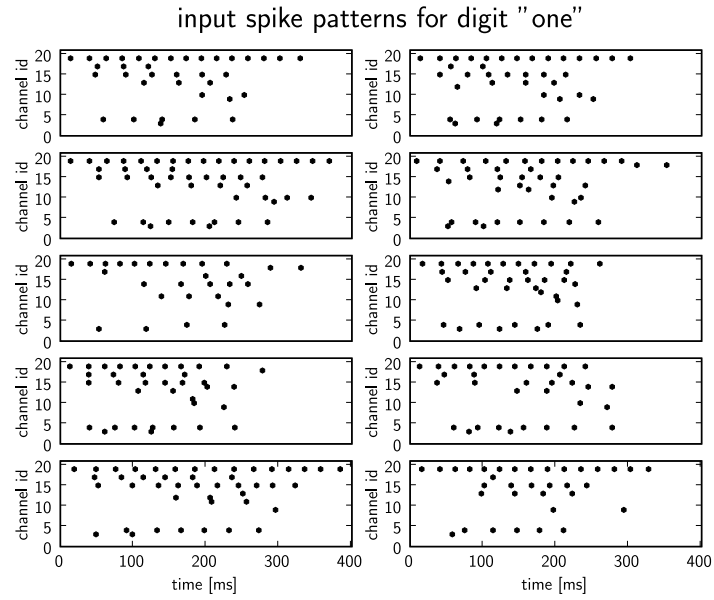

Figure S10: Spike encodings of 10 utterances of digit "one" by one speaker with the Lyon cochlea model [44], which were used as circuit inputs for computer simulation 5.
